# Supplementary material
Source: Springer Nature journal article supplement (https://www.springermedizin.de/resource/supplementary/12937_2009_279_MOESM1_ESM.pdf/25654772)

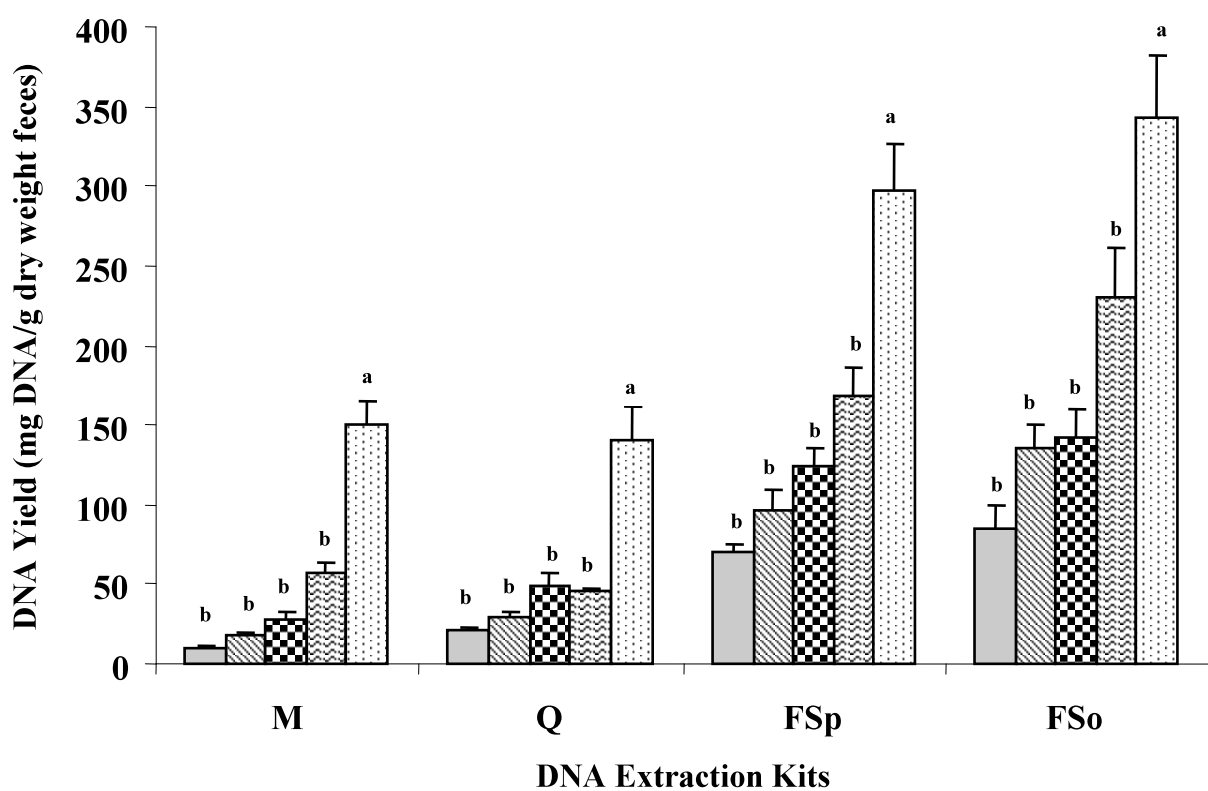

200 mg
  100 mg
  50 mg
  25 mg
  10 mg

Supplement: MOESM1 [file 25654772]
